# Supplementary material for: Increased Outdoor PM2.5 Concentration Is Associated with Moderate/Severe Anemia in Children Aged 6–59 Months in Lima, Peru
Source: J Environ Public Health. 2019 Jul 24;2019:6127845. doi: 10.1155/2019/6127845 (PMC6681625; doi:10.1155/2019/6127845)
Supplement: Supplementary Materials — Supplementary Figure 1: (a) population density of Lima by district; (b) distribution of the study population by district. Supplementary Figure 2: (a) average PM2.5 values by Lima zone; (b) anemia prevalence (%) by Lima zone. [file 6127845.f1.docx]

## Supplementary material


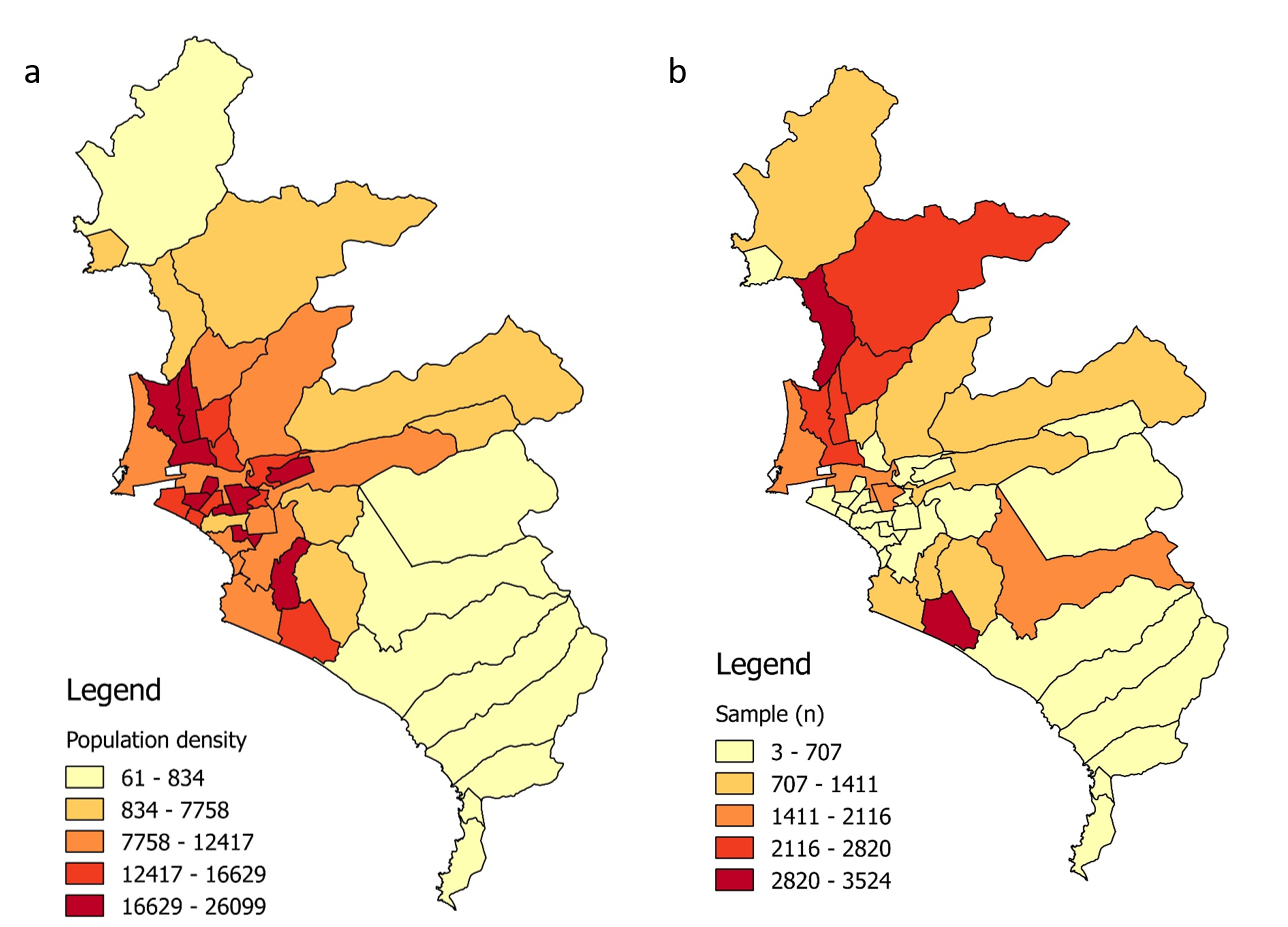


Supplementary Figure 1. (a) Population density of Lima by district (b) Distribution of the study population by district.


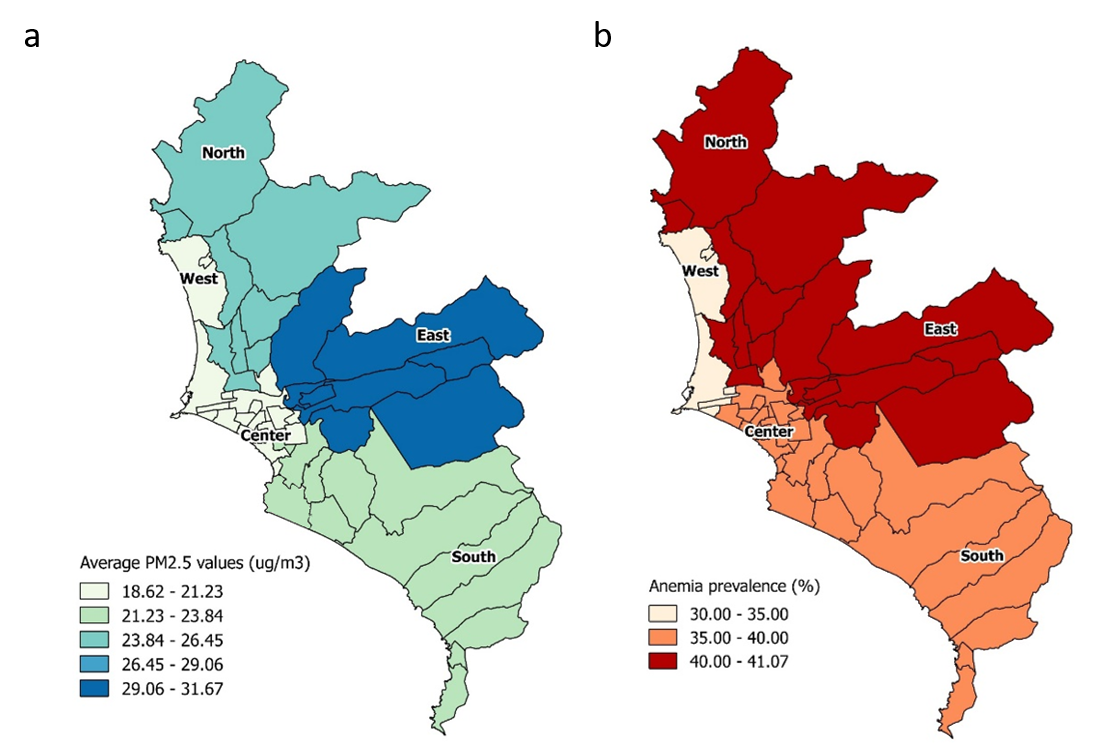
 Supplementary Figure 2. (a) Average PM2.5 values by Lima Zones. (b) Anemia prevalence (%) by Lima zones.
